# **Auxin-induced expression divergence between Arabidopsis species likely originates within the TIR1/AFB-AUX/IAA-ARF signaling network**

running title: comparative transcriptomics of auxin-responses

Jana Trenner<sup>1,\*</sup>, Yvonne Poeschl<sup>2,3,\*</sup>, Jan Grau<sup>3</sup>, Andreas Gogol-Döring<sup>2,3</sup>, Marcel Quint<sup>1,4</sup> and Carolin Delker<sup>1,4</sup>

<sup>1</sup> Department of Molecular Signal Processing, Leibniz Institute of Plant Biochemistry, Weinberg 3, 06120 Halle (Saale), Germany

<sup>2</sup> German Centre for Integrative Biodiversity Research (iDiv) Halle-Jena-Leipzig, Deutscher Platz 5e, 04103 Leipzig, Germany

<sup>3</sup> Institute of Computer Science, Martin Luther University Halle-Wittenberg, Von-Seckendorff-Platz 1, 06120 Halle (Saale), Germany

<sup>4</sup> Institute of Agricultural and Nutritional Sciences, Martin Luther University Halle-Wittenberg, Betty-Heimann-Str. 5, 06120 Halle (Saale), Germany

\* these authors contributed equally to this work

author for correspondence : Carolin Delker

carolin.delker@landw.uni-halle.de

phone: +49-345-55821232

fax: +49-345-55821219

Jana Trenner                      Jana.Trenner@ipb-halle.de

Yvonne Poeschl                      yvonne.poeschl@informatik.uni-halle.de

Jan Grau                              grau@informatik.uni-halle.de

Andreas Gogol-Döring              gogol-doering@idiv.de

Marcel Quint                      marcel.quint@landw.uni-halle.de

## 30 Abstract

Auxin is an essential regulator of virtually all aspects of plant growth and development and components of the auxin signaling pathway are conserved among land plants. Yet, a remarkable degree of natural variation in physiological and transcriptional auxin responses has been described among *Arabidopsis thaliana* accessions. Such variations might be caused by divergence in promoter or coding sequences of signaling and/or response genes that ultimately result in altered protein levels or functions. As intra-species comparisons offer only limited sequence variation, we here combined physiological, transcriptomic and genomic information to inspect the variation of auxin responses between *A. thaliana* and *A. lyrata*. This approach allowed the identification of genes with conserved auxin responses in both species and provided novel genes with potential relevance for auxin biology. Furthermore, gene expression and promoter sequence divergence were exploited to assess putative sources of variation. *De novo* motif discovery identified variants of known as well as novel promoter elements with potential relevance for transcriptional auxin responses. Furthermore, expression of *AUXIN/INDOLE-3-ACETIC ACID* (*AUX/IAA*) signaling genes was highly diverse between *A. thaliana* and *A. lyrata*. Network analysis revealed positive and negative correlations of inter-species differences in the expression of *AUX/IAA* gene clusters and classic auxin-related genes. We conclude that variation in general transcriptional and physiological auxin responses may originate substantially from functional or transcriptional variations in the *TRANSPORT INHIBITOR RESPONSE 1/AUXIN SIGNALING F-BOX*, *AUX/IAA* and *AUXIN RESPONSE FACTOR* signaling network. In that respect, *AUX/IAA* gene expression divergence potentially reflect differences in the manner in which different species transduce identical auxin signals into gene expression responses.

## Introduction

Auxin's capacity to regulate the essential cellular processes of division, elongation and differentiation integrates it in the regulation of virtually all developmental and physiological plant processes. On a molecular level, auxin responses involve extensive and rapid changes in the transcriptome (Paponov et al., 2008). This response depends on a signaling pathway which is constituted by three main signaling components: (i) *TRANSPORT INHIBITOR RESPONSE1/AUXIN SIGNALING F-BOX1-5* (*TIR1/AFBs*) auxin-co-receptors, (ii) *AUXIN/INDOLE-3-ACEDIC ACID* (*AUX/IAA*) family of auxin co-receptors/transcriptional repressors, and (iii) the *AUXIN RESPONSE FACTOR* (*ARF*) family of transcription factors (Quint and Gray, 2006).

ARFs induce or repress the expression of genes by binding to auxin-responsive elements (AuxRE) in the respective promoter regions (Guilfoyle et al., 1998; Ulmasov et al., 1999). When auxin levels are low, AUX/IAAs in concert with additional repressors such as TOPLESS heterodimerize with ARFs which prevents ARF regulatory action on auxin-responsive genes (Weijers et al., 2005; Szemenyei et al., 2008). The presence of auxin is sensed by a co-receptor complex formed by the cooperative binding of auxin by the TIR1/AFB F-box subunit of an SCF-type E3 ligase and an AUX/IAA protein (Dharmasiri et al., 2005; Kepinski and Leyser, 2005; Calderón Villalobos et al., 2012). This binding results in the polyubiquitylation of the AUX/IAAs by the SCF<sup>TIR1/AFB</sup> complex (Maraschin et al., 2009). The subsequent proteasomal degradation of the tagged AUX/IAAs causes a de-repression of ARF transcription factors, which are then released to initiate transcriptional changes (Ramos et al., 2001; Zenser et al., 2001). The three key signaling elements of TIR1/AFBs, AUX/IAAs, and ARFs are encoded by gene families of six, 29 and 23 members, respectively (Chapman and Estelle, 2009). The virtually infinite possibilities of combinations among the individual gene family members with putatively different signaling capacities could ultimately be responsible for the wide range of auxin signaling outputs observed throughout plant growth and development (Calderon Villalobos et al., 2012; Salehin et al., 2015).

The auxin signaling pathway seems to be conserved among land plants as individual core components are present already in the liverwort *Marchantia polymorpha* (Kato et al., 2015). With the universal impact of auxin on plant growth and development, an open question in auxin biology remains whether auxin signaling and response contribute to adaptive processes to local environmental conditions and challenges. First data indicating that the read-out of an auxin stimulus can be highly variable were obtained by the analysis of natural variation of physiological and transcriptional auxin responses among different accessions of *A. thaliana* (Delker et al., 2010). Apart from a striking diversity in auxin-induced transcriptome changes, a remarkably high variation among accessions was detectable for co-expression networks of early auxin signaling components. These variations gave rise to the hypothesis that altered equilibria of specific signaling components might contribute to the variation observed on the general transcriptome and ultimately on the physiological level (Delker et al., 2010). Here, we performed a cross-species analysis of auxin responses in the closely related sister species *A. thaliana* and *A. lyrata* in a comparative transcriptomics approach. The increased genetic variation between the two *Arabidopsis* species compared to the variation among different accessions allowed (i) the identification of genes with similar auxin responses in both species that might constitute essential or conserved auxin response genes. We furthermore aimed (ii) to exploit the genetic variation in promoter

102 sequences to identify *cis*-regulatory elements that might contribute to similar or  
differential auxin responses, and (iii) we aimed to test whether the previously  
104 hypothesized variation in early auxin signaling gene expression as a source for  
downstream variation could be verified in a system with higher genetic variation.

## 106 **Materials and Methods**

### *Plant material and growth conditions*

108 *A. thaliana* accession Col-0 (N1092) and *A. lyrata* accession (N22696) were obtained  
from the Nottingham Arabidopsis Stock Centre. Seeds were surface-sterilized and  
110 imbibed in deionized H<sub>2</sub>O for 3 d at 4 °C before sowing. Seedlings were germinated  
and grown under sterile conditions on solid or in liquid *Arabidopsis thaliana* solution  
112 (ATS) nutrient medium (Lincoln et al., 1990). For growth assays, seedlings were  
cultivated on vertical un-supplemented ATS for 3 d (IAA), 4 d (TIHE) or 5 d (2,4-D and  
114 NAA) before transfer to plates supplemented with IAA, 2,4-D, or NAA at the indicated  
concentrations or before transfer of plates to 28 °C (TIHE). Root lengths were  
116 quantified after an additional 5 d (IAA) or 3 d (2,4-D and NAA), hypocotyl growth was  
quantified after additional 4 d at 28 °C. All experiments were performed in long-day  
118 conditions (16 h light/8 h dark) and a fluence rate of ~ 230 μmol m<sup>-2</sup> sec<sup>-1</sup> (root growth  
assays) or 30 μmol m<sup>-2</sup> sec<sup>-1</sup> (TIHE). To visualize auxin and temperature responses,  
120 relative root and hypocotyl lengths of hormone- and temperature-treated seedlings,  
respectively, were determined as percent in relation to the median value of 20 °C  
122 grown plants. Statistical analyses (1- and 2-way ANOVAs) were performed on the  
untransformed raw data. For expression studies and [<sup>3</sup>H]-IAA uptake assays, seeds  
124 were germinated and cultivated in liquid ATS under continuous illumination to minimize  
potential circadian effects. For expression analyses, ATS was supplemented with 1 μM  
126 IAA for 0, 1 h, and 3 h after seven days. Yellow long-pass filters were applied in all IAA  
treatment experiments to prevent photodegradation of IAA.

### 128 [<sup>3</sup>H]-IAA uptake assay

Three biological replicates of seven days-old seedlings were treated with 2 nM of [<sup>3</sup>H]-  
130 IAA (Hartmann Analytic, Germany) per mg seedling fresh weight in liquid ATS for 1 h.  
Samples were subsequently washed with liquid ATS ten times before quantification via  
132 scintillation count.

### *RNA extraction and microarray hybridization*

134 RNA was extracted from three biological samples of seven days-old whole seedlings

using the RNeasy Plant Mini Kit (Qiagen) including the on-column Dnase treatment according to the manufacturers description. After assessment of RNA integrity the samples were sent to the Nottingham Arabidopsis Stock Centre's microarray hybridization service for further processing and hybridization to the ATH1-121501 microarray.

#### *Probe masking, data normalization and data processing*

The raw data generated by NASC was pre-processed and corrected according to (Poeschl et al., 2013) including the proposed polynomial correction of probe intensities. The data matrix contained the expression values for 16315 genes at three time points (with three biological replicates each) for both species.

Significant changes in auxin-induced expression were determined by a modified t-test (Opge-Rhein and Strimmer, 2007). P-values were Benjamini-Hochberg-corrected for multiple testing and genes significantly ( $\text{fdr} < 5\%$ ) changed by a factor of two or more ( $|\log_2 \text{fold change}| > 1$ ) were considered to be differentially expressed.

#### *Modified Pearson correlation*

To incorporate the information on variation among the biological replicate measurements at each time point in the correlation analyses, a modified Pearson correlation coefficient ( $\text{mod}.r$ ) was introduced.  $\text{mod}.r(x_A, x_B)$  of the expression profiles for two genes A and B was computed by dividing the covariance of the mean expression profiles  $\text{cov}(\bar{x}_A, \bar{x}_B)$  by the product of the standard deviations of the expression profiles  $\text{sd}(x_A) \cdot \text{sd}(x_B)$ , which is given by the formula:

$$\text{mod}.r(x_A, x_B) = \frac{\text{cov}(\bar{x}_A, \bar{x}_B)}{\text{sd}(x_A) \cdot \text{sd}(x_B)}$$

The mean expression profiles ( $\bar{x}_A$  and  $\bar{x}_B$ ) consist of one value per time point, which represent the means of the respective replicates.

#### *Cluster Analysis*

A total of N=9091 genes were selected based on a coefficient of variation (cv) in expression profiles of  $\text{cv} > 0.05$ . A hierarchical clustering with average linkage was performed on N expression profiles using  $1 - \text{mod}.r$  as distance measure. Each expression profile consists of 18 measurements representing the three biological replicates of three time points and two species. The resulting dendrogram was cut level 0.1 ( $\text{mod}.r = 0.9$ ) and resulting clusters were subsequently filtered by the following parameters: Clusters needed to contain at least 5 genes of which 70% showed a

significant difference in species, time point and interaction as assessed by two-way  
168 ANOVAs which resulted in 14 clusters containing 337 genes in total.

### *Promoter Analysis*

170 Promoter sequences for *A. thaliana* and *A. lyrata* were extracted using the annotation  
provided by Phytozome v7.0 (<http://www.phytozome.com>). A promoter sequence was  
172 defined as 500 bp upstream the transcription start site to 100 bp downstream the  
transcription start site, or to the start codon, whichever came first.

### *Extraction and assignment of known cis-elements*

Extracted promoter sequences were analyzed for the presence of a set of annotated  
176 *cis*-elements and their reverse complements from [http://arabidopsis.med.ohio-  
state.edu/AtcisDB/bindingsites.html](http://arabidopsis.med.ohio-state.edu/AtcisDB/bindingsites.html) (last accessed 2014/02/03) extended by a set of 10  
178 *cis*-elements described in literature to be involved in auxin response/signaling (Tab.  
S2). Motifs shorter than six bases were excluded from the analysis. The sequences of  
180 the motifs were used as regular expressions to compute their occurrences in the  
promoter sequences.

### *Determination of promoter and expression divergence*

Similarities of promoter sequences of an orthologous gene pair was assessed by  
184 determining the occurrence of each possible 8-mer in each of the two promoter  
sequences and computing the Pearson correlation coefficient of the two vectors of k-  
186 mer counts (*kmer.r*) as proposed in (Vinga and Almeida, 2003). Promoter divergence  
was assessed as  $1 - \text{kmer.r}$  and expression divergence was determined as  $1 - \text{mod.r}$ .

### *De-novo identification of putative cis-elements*

Dimont (Grau et al., 2013) was used for identification of putative novel *cis*-elements  
190 with slight modifications from the published procedure which are comprehensively  
described in the Supplemental Methods Section.

### *Co-expression Analysis using Profile Interaction Finder (PIF)*

The *Profile Interaction Finder* algorithm (PIF, [Poeschl et al., 2014]) was applied in its  
194 second mode using eight input profiles of the individual mean expression profiles of the  
eight *AUX/IAA* gene clusters (Figure 5B). We applied the PIF to the set of genes  
196 showing a  $cv > 0.05$  to prevent false-positive correlation based on noise. Parameters  
and thresholds for the identification of positively or negatively correlated genes were  
198 set to a  $|\text{PIF-correlation}|$  of  $> 0.7$ , neighbor number  $k = 1$  and a 75 % bootstrap

occurrence (n=1000).

## 200 GO-term Analysis

GO-terms for *A. thaliana* genes were provided by MapMan [Thimm et al., 2004]. Over-  
202 or under-representation of GO-terms was assessed by a two-sided Fisher's exact test  
using the *stats* package. Resulting p-values were Benjamini- Hochberg corrected for  
204 multiple testing using *multtest* package [Pollard et al., 2005].

## Statistical and computational analyses

206 Analyses were performed using the software R (R Core Team, 2015) with  
implementation of the following packages: beeswarm (Eklund, 2015), gplots (Warnes et  
208 al., 2014), st (Opgen-Rhein and Strimmer, 2007), multtest (Pollard et al., 2005).

## Accession numbers

210 The cross-species hybridization microarray data analyzed in this article are publicly  
available at  
212 <http://data.iplantcollaborative.org/quickshare/8e9b2f0212c8a1bc/Exp579.zip>.

## Results and Discussion

214 We inspected inter-species variation of auxin responses between *A. thaliana* and *A.*  
*lyrata* taking advantage of the close relation of the two *Arabidopsis* species which  
216 provides extensive synteny despite considerable genetic variation, for example in total  
genome size (Hu et al., 2011). The aim was to combine physiological, transcriptomic  
218 and genomic information to assess the extent of inter-species variation in auxin  
responses on several levels and to identify genes with conserved transcriptional  
220 responses. Furthermore, we wanted to exploit the genetic variation among the two  
sister species to gain further insights into the molecular mechanisms that contribute to  
222 naturally occurring variation in auxin responses which might ultimately reflect  
consequences of adaptation processes.

## 224 Physiological auxin responses

To assess whether *A. thaliana* and *A. lyrata* show differences in physiological auxin  
226 responses, we used classic auxin response assays that focus on the quantitative  
reaction of seedling growth to exogenously applied auxin or to a temperature-induced  
228 increase of endogenous auxin levels. We performed several of these assays, testing  
the response to the naturally prevalent auxin indole-3-acetic acid (IAA) as well as  
230 several synthetic auxins, to assess the extent of natural inter-species variation between

# *A. thaliana* and *A. lyrata*.

232 In terms of relative growth effects, a high diversity in responses to natural and synthetic  
auxins was observed (Fig. 1A-D). While *A. thaliana* is less sensitive with respect to  
234 IAA-induced root growth inhibition (Fig. 1A), a higher sensitivity in temperature-induced  
hypocotyl elongation (TIHE) was observed (Fig. 1D). *A. thaliana*'s response to the  
236 synthetic auxin 2,4-Dichlorophenoxyacetic acid (2,4-D) was significantly stronger than  
the response of *A. lyrata* (Fig. 1B). In contrast, 1-Naphthaleneacetic acid (NAA)-  
238 induced root growth inhibition was almost similar in both species (Fig. 1C). Overall, the  
extent of variation in auxin responses between *A. thaliana* and *A. lyrata* seems to be  
240 highly dependent on the specific auxinic compound and the analyzed organ. The  
compound- and tissue-specificity might indicate differential sources for the observed  
242 response differences putatively involving any or all aspects of auxin biology ranging  
from biosynthesis (in case of TIHE) to transport, sensing, signal transduction and/or  
244 metabolism.

## *Microarray-based transcriptional profiling of auxin responses*

246 For *A. thaliana*, natural variation among different accessions was observed on  
physiological as well as on transcriptional levels (Delker et al., 2010). We thus  
248 conducted a similar microarray-based analysis of transcriptional auxin responses  
comparing *A. thaliana* and *A. lyrata* using a cross-species hybridization approach. The  
250 experimental set up was similar to that reported previously (Delker et al., 2010). In  
brief, seven days-old seedlings grown in liquid culture were treated with 1  $\mu$ M IAA for  
252 one and three hours, respectively. Isolated RNAs from treated and control (untreated)  
seedlings were subsequently processed and hybridized to the Affymetrix ATH1  
254 microarray. To exclude potential effects of differential auxin uptake on the  
transcriptional read-out, we quantified the amount of radio-labeled auxin in seven days-  
256 old seedlings exposed to [ $^3$ H]-IAA for one hour (Fig. 2A). The lack of statistically  
significant differences in [ $^3$ H]-IAA levels indicated similar IAA uptake capacities in *A.*  
258 *thaliana* and *A. lyrata*. To further omit putative effects of differential internal transport we  
applied IAA in a concentration (1  $\mu$ M) that is high enough to ensure saturation

260 The hybridization of a non-intended species to a species-specific microarray requires a  
probe-masking procedure in the processing of the expression data to avoid false-  
262 positive and false-negative results caused by mis-hybridization of probes due to  
sequence variations between the two species. Here, a sequence-based masking  
264 approach was applied that allows for one mismatch per probe and retained only those  
genes that are represented by at least three probes per probe set and uniquely

266 hybridize to orthologous genes in *A. thaliana* and *A. lyrata* (Poeschl et al., 2013). As a  
 268 result of the masking procedure, 16315 genes were retained for expression  
 268 comparisons between *A. thaliana* and *A. lyrata*. To correct for putative effects of one  
 270 tolerated mismatch per probe on the expression level we implemented a fourth-degree  
 270 polynomial correction option in the RMA-normalizing procedure as suggested by  
 272 Poeschl et al. (2013). After normalization we inspected the expression levels of various  
 272 constitutively expressed genes designated as superior expression reference genes in  
 274 *A. thaliana* (Czechowski et al., 2005). This subset of genes showed similar transcription  
 274 profiles as well as largely similar expression levels in both *Arabidopsis* species  
 indicating the comparability of the two data sets (Fig. S2).

276 To analyze auxin-induced transcriptome changes, differentially expressed genes in  
 276 both species were identified based on a significant ( $\text{fdr} < 0.05$ ) change in expression  
 278 with a  $|\log_2 \text{fold change}| > 1$ . Several hundred genes were differentially regulated in  
 278 response to auxin in both species (Fig. 2B). Considerably more genes were  
 280 differentially regulated in *A. thaliana* in response to one hour of auxin treatment than in  
 280 *A. lyrata*, whereas after three hours more genes were responsive in *A. lyrata*. Overall,  
 282 the number of down-regulated genes was relatively high in comparison to other auxin-  
 282 response transcriptome analyses (Paponov et al., 2008; Delker et al., 2010). In  
 284 accordance with previous studies, we focused primarily on differentially up-regulated  
 284 genes in the subsequent analyses.

## 286 *Identification of conserved response genes*

Several gene families are known to be up-regulated by elevated auxin levels in *A.*  
 288 *thaliana* (Paponov et al., 2008). The cross-species approach might provide further  
 288 insights into the identity of genes that are conserved in their response to auxin and  
 290 might thus be of particular importance for auxin signaling, metabolism and/or response.  
 The intersection of up-regulated genes among the two *Arabidopsis* species was  
 292 moderate at both time points (Fig. 2C). Among the commonly up-regulated genes were  
 292 individual members of prominent auxin-response gene families such as the  
 294 *ASYMMETRIC LEAVES/LATERAL ORGAN BOUNDARIES DOMAIN* (ASL/LBD),  
 294 *GRETCHEN HAGEN 3* (GH3), *AUX/IAA* and *SMALL AUXIN UPREGULATED* (SAUR)  
 296 families (Tab. 1 and Tab. S1), validating the successful auxin induction. In addition,  
 296 numerous other genes were induced by auxin treatment in both species. This included  
 298 known auxin-responsive genes (e.g. *ARABIDOPSIS THALIANA HOMEBOX 2*  
 298 (*HAT2*)/AT5G47370), genes associated with other phytohormones (e.g. 1-  
 300 *AMINOCYCLOPROPANE-1-CARBOXYLATE SYNTHASE 11* (ACS11)/AT4G08040,  
*BRASSINOSTEROID INSENSITIVE LIKE 3* (BRL3)/AT3G13380, *GIBBERELLIN 2-*

302 *OXIDASE 8 (GA2ox8)/AT4G21200*) as well as several genes with so far unknown  
function (e.g. *AT1G29195*, *AT1G64405*, etc). The latter group in particular might be of  
304 interest as the conserved response to the auxin stimulus in both species might indicate  
potential new candidate genes relevant for auxin responses.

### 306 *Inter-species expression responses in auxin-relevant gene families*

To further investigate similarities and specificities of transcriptional auxin responses in  
308 *A. thaliana* and *A. lyrata*, we performed a cluster analysis of genes that showed a  
change in expression in at least one species at any of the analyzed time points with a  
310 coefficient of variation (cv) > 0.05. A modified Pearson correlation (*mod.r*) was used as  
a distance measure in the hierarchical clustering to incorporate information on the  
312 variation among the three biological replicates at each analyzed time point. To filter for  
correlations among genes with potential biological relevance, we further applied a  
314 minimum cut-off in correlation of *mod.r* = 0.7. The resulting 14 gene clusters fall into  
two clearly distinct groups (Fig. 3). Clusters 1 - 8 and clusters 9 - 14 are predominantly  
316 characterized by genes that show a higher expression level and/or response in *A.*  
*lyrata* or *A. thaliana*, respectively. Only very few clusters show high similarities among  
318 the expression profiles of both species (e.g. cluster 2 and 9). The majority of cluster  
profiles show small to striking differences between the two species in either expression  
320 levels (e.g. cluster 8) or expression response in terms of induction/repression profiles  
(e.g. cluster 3) or both (e.g. cluster 11). We next inspected whether the presence and  
322 frequency of known *cis*-regulatory elements in the promoters of clustered genes could  
explain the observed patterns of similarities or differences in the expression profiles of  
324 individual clusters. We limited the size of the putative promoter region to 500 bp  
upstream of the transcription start site. While eukaryotic promoters can arguably be  
326 much larger, the majority of *cis*-regulatory sequences should be present within this 500  
bp interval (Franco-Zorrilla et al., 2014). We analyzed the presence of 99 known *cis*-  
328 regulatory elements taken from the *Arabidopsis* *cis*-regulatory element database  
(<http://arabidopsis.med.ohio-state.edu/AtcisDB/>) and additional literature (Tab. S2). Of  
330 the total number of motifs (n = 109) 35 known *cis*-elements were detected in at least  
one of the promoter sequences of clustered genes with significantly altered expression  
332 (Tab. S3). To assess whether the presence of certain regulatory sequences explains  
the distinct expression profiles, we initially focused on *cis*-elements known or predicted  
334 to be involved in auxin responses such as different varieties of the auxin responsive  
element (AuxRE), the E-box/hormone up at dawn (HUD) element and the TGA2  
336 binding site motif (Keilwagen et al., 2011a; Liu et al., 1994; Nemhauser et al., 2004;  
Vert et al., 2008).

338 Auxin-related *cis*-regulatory elements were detected in all of the clusters. There was a  
 340 certain degree of redundancy in the analysis due to sequence overlaps among  
 342 differently labeled or modified sequences of elements, e.g., in various versions of the  
 AuxRE (Nos. 11,18, and 20, Fig. 3, Tab. S3). Yet, neither the frequency of AuxREs nor  
 344 any other *cis*-element seemed to explain the similarities or differences in the  
 expression behavior (i.e., auxin response pattern) of the gene clusters (Fig. 3, Fig. S3).  
 346 Even for cluster 9, which shows clearly up-regulated profiles in both species and  
 includes several prominent auxin-responsive genes, only roughly 50% of the genes  
 348 contained a version of the AuxREs. This observation is in accordance with several  
 previous studies in *A. thaliana* which showed a lack of AuxREs in a substantial number  
 of auxin-regulated genes (Nemhauser et al., 2004). Furthermore, expression  
 differences among *A. thaliana* and *A. lyrata* did not show a clear pattern of correlation  
 350 to the species-specific presence of individual regulatory elements in the promoters of  
*A. thaliana* (gray) or *A. lyrata* (green). However, these observations remain subjective  
 352 as statistical tests for over- or under-representation of elements are hindered by the  
 low number of genes present in several of the clusters identified here.

#### 354 *Expression divergence vs. promoter divergence*

The lack of any obvious correlation of known *cis*-elements and auxin-induced  
 356 expression patterns prompted a *de novo* search for putatively new regulatory  
 sequences. The data set seemed ideal as the two *Arabidopsis* species are distant  
 358 enough to provide considerable sequence variation in promoter regions while providing  
 sufficient similarities to allow for local alignments of the sequences (Hu et al., 2011).  
 360 However, a prerequisite for this approach would be a general correlation between the  
 diversity in the promoter sequence and the differences detected on the expression  
 362 level. To evaluate this assumption, we compared promoters of three groups of genes:  
 (i) the set of conserved genes with a significant induction in expression in response to 1  
 364 h of auxin treatment in both species (n = 68), (ii) promoters of genes that are up-  
 regulated in at least one of the analyzed species (n = 297) which include also the 68  
 366 genes of group (i) that met the threshold of auxin-induction in both species. We  
 retained this gene set in group (ii) as the kinetics of expression profiles might still show  
 368 differences among the two species. Group (iii) included neutral genes that did not show  
 a significant alteration in expression as a control set (n = 11195). We then calculated  
 370 the expression divergence of expression profiles between each orthologous gene pair  
 using *mod.r*. Similarities of promoter sequences were assessed by a sliding window  
 372 approach to compute the correlation of the occurrence of all possible 8-mers across the  
 promoters of orthologous genes (*kmer.r*, Vinga and Almeida, 2003).

374 As expected, expression divergence for genes with a conserved up-regulation in both  
species is rather low and seems to be independent of promoter divergences (Fig. 4A).  
376 Similarly, no correlation among expression and promoter divergence was observed for  
neutral genes that did not show expression changes in response to auxin. However, for  
378 group (ii) including all genes with a differential response in at least one of the two  
analyzed species, a wide range in expression divergence as well as promoter  
380 divergence was observed which showed a considerably higher correlation compared to  
the other two gene sets (Fig. 4A). Hence, both auxin-responsive gene sets showed the  
382 expected pattern of relationships between expression and promoter divergence, which  
made them suitable candidate sets for *de novo* identification of regulatory promoter  
384 elements.

#### *De novo identification of putative cis-regulatory elements*

386 Based on the promoter divergence analysis we selected two gene sets for motif  
discovery (positive data sets). The first set comprised an extended set of genes that  
388 were induced in both species after 1 h of auxin treatment. As we did not limit the  
selection by filtering via corrected p-values, this set extended the previously shown set  
390 of genes of up-regulated in both species to a total of 81 orthologous gene pairs. Data  
set 2 comprises promoters of an extended set of genes that were up-regulated in at  
392 least one species. For this second data set we only included the promoter sequence of  
the species that showed a significant up-regulation of a gene in response to auxin  
394 (n = 845 promoter sequences). The corresponding promoter sequence of the other  
species of an orthologous gene pair was included in the control data set 2 following the  
396 rationale that regulatory elements required for the auxin response are absent in this  
case.

398 Applying the discriminative motif discovery tool *Dimont* (Grau et al., 2013), we identified  
motifs with significant over-representation in each of the two data sets of auxin-induced  
400 genes in comparison to their respective control data sets (see Methods for details).  
Among the motifs identified in both data sets were sequences with high to medium  
402 similarities to TATA box elements (Fig. 4B, motifs A - C). TATA boxes are present in  
approximately 28 % of all *Arabidopsis* genes with a predominance of non-  
404 housekeeping genes (Molina and Grotewold, 2005). Interestingly, yeast genes  
containing a TATA box showed increased inter-species variation in expression  
406 responses to a variety of environmental stresses (Tirosh et al., 2006). It was  
hypothesized that core promoters including a TATA box might be more sensitive to  
408 genetic perturbations and could be a driving factor in expression divergence (Tirosh et  
al., 2006). As TATA-like elements were enriched in both analyzed data sets they might

rather reflect the general rapid and partially strong induction of these genes in response to an external stimulus. In yeast, TATA-containing promoters showed a slightly higher tendency for higher expression after a heat shock (Kim and Iyer, 2004). The identification of novel variants of AuxRE- and HUD-like motifs (Fig. 4B, motifs D - F) corresponds with their previously demonstrated function in auxin-mediated expression induction (Walcher and Nemhauser, 2012). The identification of these putatively novel variations of known elements may indicate a higher tolerance for sequence variation in the *cis*-regulatory motif that only becomes evident with a higher degree of genetic variation among genome sequences included in this analysis. Recent advances in understanding the mode of ARF transcription factor binding to target promoter sequences substantiates this assumption. Structure-function analysis indicated that different ARF proteins seem to have altered affinities for different variations of AuxREs (Boer et al., 2014). These specificities could account at least partially for functional specifications of individual ARFs and might also be a contributing factor in natural variation of transcriptional auxin responses.

In addition, other putatively novel *cis*-regulatory sequences were found to be significantly enriched in genes that were induced by auxin in both species (Fig. 4 and Fig. S4, motifs G - L). To the best of our knowledge, these sequences have not been described previously. To assess the potential significance of these elements with respect to auxin responses, we tested whether they were also enriched in auxin-induced genes in an independent auxin-response transcriptome dataset generated for *A. thaliana* seedlings (Nemhauser et al., 2006). Two of the sequences (Fig. 4B, motifs G + H) were indeed found to be enriched significantly ( $p < 0.05$ ) in differentially expressed genes in this additional data set (Fig. S4), highlighting their potential relevance for auxin-induced transcriptional regulation. We then inspected whether the presence/absence of any of the *de novo*-identified promoter sequences can account for the differential expression responses or levels of distinct gene clusters (Fig. S3). However, similarly to the analysis of already known *cis*-elements taken from literature or databases, no coincidence pattern of *de novo* promoter elements and expression response could be identified despite the enrichment of these sequences in auxin-regulated genes. While we cannot exclude that the newly identified promoter sequences may be of minor functional relevance, the analysis as a whole rather points towards a highly complex orchestration of auxin-induced expression responses involving multiple *cis*-element variations. The identification of sequences with homology to AuxREs and HUD indicates a general success in the analytical approach. The diversity in auxin-induced expression responses via combinations of multiple different transcription factors and their individual target promoter sequences has been shown

previously in case of the AuxRE and HUD elements (Nemhauser et al., 2006).

448 Unraveling the combinatorial code of regulatory elements will require highly  
sophisticated bioinformatic approaches, a higher number of transcription profile data  
450 sets from diverse genetic backgrounds for in-depth phylogenetic footprinting analyses  
and ultimately extensive functional validation.

452 While the complex promoter code of auxin-induced transcriptional variation remains  
somewhat elusive, the general hierarchy of the auxin signal transduction pathway is  
454 well known. Transcriptional responses to auxin are primarily mediated via the  
TIR1/AFB-AUX/IAA-ARF signaling pathway. All three components are encoded by  
456 gene families. Individual members of these families seem to have partial redundancies  
in their spatio-temporal expression patterns and have at least partially distinct  
458 biochemical properties (Okushima et al., 2005; Paponov et al., 2008; Rademacher et  
al., 2011; Parry et al., 2009; Calderón Villalobos et al., 2012). As quantitative  
460 alterations in the equilibrium of these signaling components may significantly affect  
downstream responses, we next focused on this particular group of genes specifically.

462 *Divergence of AUX/IAA gene expression is reflected in downstream responses*

Highly diverse co-expression profiles of signaling components have been shown  
464 previously in a comparison among seven different accessions of *A. thaliana* (Delker et  
al., 2010). Variation in gene expression levels and co-expression patterns are indicative  
466 of altered levels of individual signaling proteins that might contribute to the differential  
responses observed initially on transcriptional and ultimately also on physiological  
468 levels (Delker et al., 2010). Differential expression was predominantly evident for  
*AUX/IAA* genes which are generally more responsive to auxin treatment than *ARFs* or  
470 *TIR1/AFBs* (Paponov et al., 2008). Variation of *AUX/IAA* transcriptional activation is  
indicative of differential signal transduction events in response to a similar stimulus.  
472 *AUX/IAA* genes constitute primary auxin-responsive genes that provide a read-out of the  
activation of the auxin signal transduction pathway. Subsequent alterations in *AUX/IAA*  
474 protein levels will likely impact further on auxin sensing by affecting the availability of  
individual auxin co-receptor complexes with potentially specific auxin sensitivities.  
476 Preferential formation of specific ARF-AUX/IAA heteromerizations may additionally  
affect transcriptional regulation. As such, the intra-specific comparison of auxin-  
478 regulated expression responses in *A. thaliana* accessions highlighted the early auxin  
signaling network as a potential source for the observed variation in downstream  
480 responses (Delker et al., 2010). In this study, we challenged this hypothesis by  
inspecting the expression responses of the core auxin signaling gene families in the  
482 cross-species comparison of auxin responses.

Members of all three gene families showed differential expression responses between the two species. Analysis of expression and promoter divergences showed a considerably stronger correlation for the highly auxin-responsive *AUX/IAA* gene family (Fig. 5A). This might be similar for the *TIR/AFB* family but the total number of only four genes retained in this analysis is generally low and effects by individual outliers might be high. While promoter divergences of *ARF* family members are also quite high, expression divergence is only low to medium (*1-mod.r* values in expression divergence from 0-1, Fig. 5A). *AUX/IAAs* have a unique role among the signaling components. Apart from their dual function in signaling as repressors of *ARF* transcription factors and co-receptors of auxin, they also constitute a group of classic and conserved auxin response genes which provide a readout for auxin responsiveness (Tab. 1, (Paponov et al., 2008)). Due to this prominent role, we inspected the expression responses of the *AUX/IAA* gene family in more detail. Hierarchical clustering allowed the identification of *AUX/IAA* subgroups based on the correlation (*1-mod.r*) in expression profiles (Fig. 5B). While cluster 1 - 3 contained *AUX/IAA* genes that were specifically induced by auxin in *A. lyrata*, cluster 5 - 8 *AUX/IAA* genes responded primarily in *A. thaliana*. In contrast, cluster 4 contained *AUX/IAA* genes that showed significantly changed expression levels in response to auxin treatment in both species. These genes are part of the conserved auxin-response gene set (Tab. 1) and form the largest cluster among the *AUX/IAA* genes (Fig. 5B). Consequently, *AUX/IAA* genes with similar expression profiles in *A. thaliana* and *A. lyrata* are indicative for similar upstream transcriptional activation/signaling events and their corresponding gene products can be speculated to have similar downstream signaling effects. In contrast to that, gene clusters with species-specific auxin responses could be indicative for the sources of natural variation seen in downstream auxin responses.

To identify genes with expression profiles that are either positively or negatively correlated to individual *AUX/IAA* gene clusters (Data file S1), we used the recently introduced *Profile Interaction Finder (PIF)* algorithm (Poeschl et al., 2014). As expected, members of several of the classic and conserved auxin response gene families showed positively correlated expression profiles to cluster 4 (Fig. 5C). This cluster shows a classic response profile of transient expression induction in both species. The respective *AUX/IAA* and co-regulated genes of known auxin-related genes seem to be part of a conserved auxin response in both species.

Clusters with more species-specific expression responses also showed correlations with genes relevant for auxin biology. For example, the expression profile of cluster 7 shows a higher expression and gradual auxin induction in *A. thaliana*, while the

expression levels in *A. lyrata* are generally lower. A similar, positively correlated pattern  
 520 in expression was observed for several auxin-relevant genes ranging from biosynthesis  
 (ASA2), to signaling (*ARF16*), transport (*PIN4*, *PIN7*), and response (*EXPANSIN A1*).  
 522 In addition, genes with negatively correlated expression profiles were also identified  
 (e.g. *ASL/LBD25*).

524 The positive and negative correlation of numerous auxin-associated genes with  
*AUX/IAA* gene clusters indicates that variation in early auxin signaling may penetrate to  
 526 downstream response levels. Ultimately, these differences could quantitatively  
 contribute to the variation observed on physiological levels. Whether the major source  
 528 of variation is actually caused by differential expression or rather by altered  
 biochemical properties due to non-synonymous mutations of signaling genes remains  
 530 to be elucidated. For example, the genome-wide variation in auxin-induced gene  
 expression may originate in the differential gene regulation and subsequent protein  
 532 levels of *AUX/IAAs* themselves. Alternatively and/or in addition, differential upstream  
 events such as auxin sensing or initial gene activation may be the actual source of  
 534 initial variation which then results in differential activation of *AUX/IAAs* and other  
 genes.

## 536 **Summary and conclusions**

We studied inter-species variation of physiological and transcriptional auxin responses  
 538 to assess whether the highly conserved auxin signaling and response pathway might  
 contribute to adaptive processes in growth and development. Transcriptome analysis  
 540 allowed the identification of genes with a highly conserved response to the auxin  
 treatment which included both, members of known auxin-responsive gene families and  
 542 so far uncharacterized genes. However, the majority of differentially expressed genes  
 in response to auxin showed significant variation in expression levels and/or response  
 544 patterns between the two *Arabidopsis* species. Neither similar nor species-specific  
 expression patterns of auxin-regulated gene clusters could be explained by the  
 546 presence of individual known or *de novo*-identified promoter elements. Thus, it remains  
 likely that a complex code of element combinations accounts for the diversity in  
 548 transcriptional auxin responses. Breaking this particular code will require extensive  
 efforts by bioinformaticians and far more available expression data from genetically  
 550 diverse backgrounds.

A significant source for variation in auxin-induced transcriptome changes likely  
 552 originates within the initial auxin signal transduction pathway itself. Distinct patterns of  
*AUX/IAA* gene cluster expressions were found to penetrate to the level of numerous

554 response genes, many of which with a known functional relevance for auxin biology.  
While *AUX/IAA* gene expression divergence may contribute directly to differential  
556 activation of downstream responses, it is also indicative for species-specific differences  
by which identical auxin signals are transduced into gene expression responses.  
558 Consequently, the triumvirate of TIR1/AFBs, *AUX/IAAs*, and ARFs harbor significant  
potential for the initiation of variation in downstream auxin signaling and response.

560

## Supplemental Material

562 **Supplemental Methods:** Comprehensive description of *de novo* identification of *cis*-  
elements

564 **Supplemental Tab. S1:** Expression response of conserved auxin up-regulated genes  
in *A. thaliana* and *A. lyrata*

566 **Supplemental Tab. S2:** collection of known *cis*-regulatory elements

**Supplemental Tab. S3:** *cis*-regulatory elements identified in significantly up-regulated  
568 genes

**Supplemental Data file S1:** Profile interaction finder results for positively and  
570 negatively correlated genes of *AUX/IAA* gene cluster

**Supplemental Fig. S1:** Absolute lengths in physiological auxin responses

**Supplemental Fig. S2:** Expression levels of non-responsive reference genes confirm  
572 successful normalization of the cross-species microarray data

**Supplemental Fig. S3:** Assignment of 35 known and 8 *de novo*-identified *cis*-elements  
to auxin-regulated gene clusters

**Supplemental Fig. S4:** *De novo*-identified *cis*-elements

## Acknowledgements

574 This work was supported by the Deutsche Forschungsgemeinschaft (Qu 141/3-1 to  
MQ).

576

578

## References

- Boer, D.R., Freire-Rios, A., van den Berg, W.A.M., Saaki, T., Manfield, I.W., Kepinski, S., López-Vidrieo, I., Franco-Zorrilla, J.M., de Vries, S.C., Solano, R., Weijers, D., and Coll, M.** (2014). Structural Basis for DNA Binding Specificity by the Auxin-Dependent ARF Transcription Factors. *Cell* **156**: 577–589.
- Calderón Villalobos, L.I.A. et al.** (2012). A combinatorial TIR1/AFB-Aux/IAA co-receptor system for differential sensing of auxin. *Nat. Chem. Biol.* **8**: 477–485.
- Calderon Villalobos, L.I.A. et al.** (2012). A combinatorial TIR1/AFB-Aux/IAA co-receptor system for differential sensing of auxin. *Nat. Chem. Biol.* **8**: 477–485.
- Chapman, E.J. and Estelle, M.** (2009). Mechanism of Auxin-Regulated Gene Expression in Plants. *Annu. Rev. Genet.* **43**: 265–85.
- Czechowski, T., Stitt, M., Altmann, T., Udvardi, M.K., and Scheible, W.-R.** (2005). Genome-wide identification and testing of superior reference genes for transcript normalization in Arabidopsis. *Plant Physiol.* **139**: 5–17.
- Delker, C., Pöschl, Y., Raschke, A., Ullrich, K., Ettingshausen, S., Hauptmann, V., Grosse, I., and Quint, M.** (2010). Natural variation of transcriptional auxin response networks in Arabidopsis thaliana. *Plant Cell* **22**: 2184–2200.
- Dharmasiri, N., Dharmasiri, S., and Estelle, M.** (2005). The F-box protein TIR1 is an auxin receptor. *Nature* **435**: 441–445.
- Eklund, A.** (2015). beeswarm: The Bee Swarm Plot, an Alternative to Stripchart. <http://www.cbs.dtu.dk/~eklund/beeswarm/>.
- Franco-Zorrilla, J.M., López-Vidriero, I., Carrasco, J.L., Godoy, M., Vera, P., and Solano, R.** (2014). DNA-binding specificities of plant transcription factors and their potential to define target genes. *Proc. Natl. Acad. Sci.* **111**: 2367–2372.
- Grau, J., Posch, S., Grosse, I., and Keilwagen, J.** (2013). A general approach for discriminative de novo motif discovery from high-throughput data. *Nucleic Acids Res.* **41**: e197–e197.
- Guilfoyle, T., Ulmasov, T., and Hagen, G.** (1998). The ARF family of transcription factors and their role in plant hormone-responsive transcription. *Cell. Mol. Life Sci.* **54**: 619 – 627.
- Hu, T.T. et al.** (2011). The Arabidopsis lyrata genome sequence and the basis of rapid genome size change. *Nat. Genet.* **43**: 476–481.
- Kato, H., Ishizaki, K., Kouno, M., Shirakawa, M., Bowman, J.L., Nishihama, R., and Kohchi, T.** (2015). Auxin-Mediated Transcriptional System with a Minimal Set of Components Is Critical for Morphogenesis through the Life Cycle in Marchantia polymorpha. *PLoS Genet.* **11**: e1005084.
- Keilwagen, J., Grau, J., Paponov, I.A., Posch, S., Strickert, M., and Grosse, I.** (2011). De-Novo Discovery of Differentially Abundant Transcription Factor Binding Sites Including Their Positional Preference. *PLoS Comput Biol* **7**: e1001070.

- Kepinski, S. and Leyser, O.** (2005). The Arabidopsis F-box protein TIR1 is an auxin receptor. *Nature* **435**: 446–451.
- Kim, J. and Iyer, V.R.** (2004). Global Role of TATA Box-Binding Protein Recruitment to Promoters in Mediating Gene Expression Profiles. *Mol. Cell. Biol.* **24**: 8104–8112.
- Lincoln, C., Britton, J., and Estelle, M.** (1990). Growth and development of the *axr1* mutants of Arabidopsis. *Plant Cell* **2**: 1071 – 1080.
- Liu, Z.B., Ulmasov, T., Shi, X., Hagen, G., and Guilfoyle, T.J.** (1994). Soybean GH3 promoter contains multiple auxin-inducible elements. *Plant Cell* **6**: 645–57.
- Maraschin, F. dos S., Memelink, J., and Offringa, R.** (2009). Auxin-induced, SCF(TIR1)-mediated poly-ubiquitination marks AUX/IAA proteins for degradation. *Plant J. Cell Mol. Biol.* **59**: 100–109.
- Molina, C. and Grotewold, E.** (2005). Genome wide analysis of Arabidopsis core promoters. *BMC Genomics* **6**: 25.
- Nemhauser, J.L., Hong, F., and Chory, J.** (2006). Different Plant Hormones Regulate Similar Processes through Largely Nonoverlapping Transcriptional Responses. *Cell* **126**: 467–475.
- Nemhauser, J.L., Mockler, T.C., and Chory, J.** (2004). Interdependency of Brassinosteroid and Auxin Signaling in Arabidopsis. *PLOS Biol.* **2**: e258.
- Okushima, Y. et al.** (2005). Functional Genomic Analysis of the AUXIN RESPONSE FACTOR Gene Family Members in Arabidopsis thaliana: Unique and Overlapping Functions of ARF7 and ARF19. *Plant Cell* **17**: 444–463.
- Opgen-Rhein, R. and Strimmer, K.** (2007). Accurate ranking of differentially expressed genes by a distribution-free shrinkage approach. *Stat Appl Genet Mol Biol* **6**: Article9.
- Paponov, I.A., Paponov, M., Teale, W., Menges, M., Chakrabortee, S., Murray, J.A.H., and Palme, K.** (2008). Comprehensive Transcriptome Analysis of Auxin Responses in Arabidopsis. *Mol. Plant* **1**: 321–337.
- Parry, G., Calderon-Villalobos, L.I., Prigge, M., Peret, B., Dharmasiri, S., Itoh, H., Lechner, E., Gray, W.M., Bennett, M., and Estelle, M.** (2009). Complex regulation of the TIR1/AFB family of auxin receptors. *Proc. Natl. Acad. Sci.* **106**: 22540–22545.
- Poeschl, Y., Delker, C., Trenner, J., Ullrich, K.K., Quint, M., and Grosse, I.** (2013). Optimized Probe Masking for Comparative Transcriptomics of Closely Related Species. *PLoS ONE* **8**: e78497.
- Poeschl, Y., Grosse, I., and Gogol-Döring, A.** (2014). Explaining gene responses by linear modeling. *Ger. Conf. Bioinforma. Volume P-235 of Lecture Notes in Informatics (LNI) - Proceedings*: 27–35.
- Pollard, K.S., Dudoit, S., and Laan, M.J. van der** (2005). Multiple Testing Procedures: R multtest Package and Applications to Genomics, in *Bioinformatics and Computational Biology Solutions Using R and Bioconductor* (Springer).

- Quint, M. and Gray, W.M.** (2006). Auxin signaling. *Curr. Opin. Plant Biol.* **9**: 448–453.
- Rademacher, E.H., Möller, B., Lokerse, A.S., Llavata-Peris, C.I., van den Berg, W., and Weijers, D.** (2011). A cellular expression map of the Arabidopsis AUXIN RESPONSE FACTOR gene family. *Plant J.* **68**: 597–606.
- Ramos, J.A., Zenser, N., Leyser, O., and Callis, J.** (2001). Rapid Degradation of Auxin/Indoleacetic Acid Proteins Requires Conserved Amino Acids of Domain II and Is Proteasome Dependent. *Plant Cell* **13**: 2349–2360.
- R Core Team** (2015). R: A Language and Environment for Statistical Computing (R Foundation for Statistical Computing: Vienna, Austria).
- Salehin, M., Bagchi, R., and Estelle, M.** (2015). SCFTIR1/AFB-Based Auxin Perception: Mechanism and Role in Plant Growth and Development. *Plant Cell* **27**: 9–19.
- Szemenyei, H., Hannon, M., and Long, J.A.** (2008). TOPLESS mediates auxin-dependent transcriptional repression during Arabidopsis embryogenesis. *Science* **319**: 1384–1386.
- Tirosh, I., Weinberger, A., Carmi, M., and Barkai, N.** (2006). A genetic signature of interspecies variations in gene expression. *Nat. Genet.* **38**: 830–834.
- Ulmasov, T., Hagen, G., and Guilfoyle, T.** (1999). Activation and repression of transcription by auxin-response factors.: 5844 – 5849.
- Vert, G., Walcher, C.L., Chory, J., and Nemhauser, J.L.** (2008). Integration of auxin and brassinosteroid pathways by Auxin Response Factor 2. *Proc. Natl. Acad. Sci.* **105**: 9829–9834.
- Vinga, S. and Almeida, J.** (2003). Alignment-free sequence comparison—a review. *Bioinformatics* **19**: 513–523.
- Walcher, C.L. and Nemhauser, J.L.** (2012). Bipartite Promoter Element Required for Auxin Response. *Plant Physiol.* **158**: 273–282.
- Warnes, G.R., Bolker, B., Bonebakker, L., Gentleman, R., Liaw, W.H.A., Lumley, T., Maechler, M., Magnusson, A., Moeller, S., Schwartz, M., and Venables, B.** (2014). gplots: Various R programming tools for plotting data.
- Weijers, D., Benkova, E., Jäger, K.E., Schlereth, A., Hamann, T., Kientz, M., Wilmoth, J.C., Reed, J.W., and Jürgens, G.** (2005). Developmental specificity of auxin response by pairs of ARF and Aux/IAA transcriptional regulators. *Embo J* **24**: 1874–1885.
- Zenser, N., Ellsmore, A., Leasure, C., and Callis, J.** (2001). Auxin modulates the degradation rate of Aux/IAA proteins. *Proc. Natl. Acad. Sci.* **98**: 11795 – 11800.

# Table 1: Conserved auxin up-regulated genes

Genes significantly up-regulated ( $\log_2$  fold change > 1) in *A. thaliana* and *A. lyrata* after 1 h (<sup>1</sup>) and/or 3 h (<sup>3</sup>) of auxin treatment in 7 days-old seedlings. Detailed information on *A. lyrata* locus identifiers, corresponding ATH1 array elements and expression levels are shown in Tab. S1.

| AUX/IAA         |                           | others                  |                         |
|-----------------|---------------------------|-------------------------|-------------------------|
| AT1G04240       | IAA3 <sup>1</sup>         | AT1G02850 <sup>3</sup>  | AT3G28740 <sup>3</sup>  |
| AT1G15580       | IAA5 <sup>1</sup>         | AT1G05560 <sup>3</sup>  | AT3G30180 <sup>3</sup>  |
| AT2G33310       | IAA13 <sup>13</sup>       | AT1G05680 <sup>13</sup> | AT3G42800 <sup>1</sup>  |
| AT3G15540       | IAA19 <sup>13</sup>       | AT1G10380 <sup>3</sup>  | AT3G43270 <sup>3</sup>  |
| AT3G23030       | IAA2 <sup>13</sup>        | AT1G14280 <sup>1</sup>  | AT3G44540 <sup>3</sup>  |
| AT3G62100       | IAA30 <sup>1</sup>        | AT1G17170 <sup>3</sup>  | AT3G50340 <sup>13</sup> |
| AT4G14560       | IAA1 <sup>13</sup>        | AT1G17180 <sup>3</sup>  | AT3G51410 <sup>1</sup>  |
| AT4G28640       | IAA11 <sup>13</sup>       | AT1G21980 <sup>1</sup>  | AT3G54950 <sup>1</sup>  |
| AT4G32280       | IAA29 <sup>13</sup>       | AT1G23340 <sup>1</sup>  | AT4G15550 <sup>3</sup>  |
| AT5G43700       | IAA4 <sup>1</sup>         | AT1G23730 <sup>3</sup>  | AT4G16515 <sup>1</sup>  |
| auxin transport |                           | AT1G29195 <sup>13</sup> | AT4G16515 <sup>3</sup>  |
| AT1G23080       | PIN7 <sup>1</sup>         | AT1G30100 <sup>1</sup>  | AT4G17350 <sup>13</sup> |
| AT1G70940       | PIN3 <sup>13</sup>        | AT1G30760 <sup>3</sup>  | AT4G21200 <sup>1</sup>  |
| AT1G73590       | PIN1 <sup>1</sup>         | AT1G32870 <sup>3</sup>  | AT4G30140 <sup>3</sup>  |
| AT2G17500       | PILS5 <sup>3</sup>        | AT1G57560 <sup>1</sup>  | AT4G37295 <sup>13</sup> |
| AT2G21050       | LAX2 <sup>1</sup>         | AT1G59740 <sup>1</sup>  | AT5G02760 <sup>13</sup> |
| ASL/LBD         |                           | AT1G64405 <sup>13</sup> | AT5G04190 <sup>1</sup>  |
| AT2G42430       | ASL18/LBD16 <sup>13</sup> | AT1G70270 <sup>13</sup> | AT5G06860 <sup>3</sup>  |
| AT2G42440       | ASL15/LBD17 <sup>13</sup> | AT2G03760 <sup>1</sup>  | AT5G12050 <sup>13</sup> |
| AT3G58190       | ASL16/LBD29 <sup>13</sup> | AT2G26710 <sup>1</sup>  | AT5G18560 <sup>1</sup>  |
| expansins       |                           | AT2G29490 <sup>1</sup>  | AT5G26930 <sup>1</sup>  |
| AT3G45970       | EXLA1 <sup>1</sup>        | AT2G39370 <sup>13</sup> | AT5G47370 <sup>13</sup> |
| AT4G17030       | EXLB1 <sup>3</sup>        | AT2G41820 <sup>1</sup>  | AT5G50130 <sup>1</sup>  |
| AT4G38400       | EXLA2 <sup>1</sup>        | AT2G47550 <sup>3</sup>  | AT5G51440 <sup>3</sup>  |
| GH3             |                           | AT3G03660 <sup>1</sup>  | AT5G52900 <sup>13</sup> |
| AT2G14960       | GH3.1 <sup>1</sup>        | AT3G09270 <sup>3</sup>  | AT5G53290 <sup>1</sup>  |
| AT2G23170       | GH3.3 <sup>13</sup>       | AT3G13380 <sup>3</sup>  | AT5G57760 <sup>1</sup>  |
| AT4G27260       | GH3.5 <sup>13</sup>       | AT3G22370 <sup>3</sup>  | AT5G61820 <sup>3</sup>  |
| AT5G54510       | GH3.6 <sup>13</sup>       | AT3G26760 <sup>1</sup>  | AT5G62280 <sup>1</sup>  |
| SAUR            |                           | AT3G26960 <sup>1</sup>  | AT5G65320 <sup>3</sup>  |
| AT2G18010       | SAUR10 <sup>1</sup>       | AT3G28420 <sup>1</sup>  | AT5G66940 <sup>1</sup>  |
| AT4G34760       | SAUR50 <sup>1</sup>       |                         |                         |
| AT4G34770       | SAUR1 <sup>1</sup>        |                         |                         |
| AT4G38850       | SAUR15 <sup>13</sup>      |                         |                         |
| AT4G38860       | SAUR16 <sup>13</sup>      |                         |                         |

## 580 Figure legends

### **Fig. 1: Physiological auxin responses of *A. thaliana* and *A. lyrata***

Relative root length (treated vs. control) of seedlings grown on different concentrations of (A) IAA, (B) 2,4-D, or (C) NAA. 3 (A) or 5 (B,C) days-old seedlings were transferred to hormone-containing medium and grown for additional 5 (A) or 3 (B,C) days. (D) Relative hypocotyl length (28 °C/20 °C) of 8 days-old seedlings. Box plots show medians (horizontal bar), interquartile ranges (IQR, boxes), and data ranges (whiskers) excluding outliers (defined as  $> 1.5 \times \text{IQR}$ ). Individual data points are superimposed as beeswarm plots. Asterisks denote significant differences between treatment responses of *A. thaliana* and *A. lyrata* as assessed by two-way ANOVA (i.e. genotype  $\times$  treatment effect,  $P < 0.05$ ) of the absolute data presented in Fig. S1.

### **Fig. 2: Quantification of [<sup>3</sup>H]-IAA uptake and ATH1-based assessment of auxin-induced transcriptome changes**

(A) 7 days-old seedlings were treated with 2 ng [<sup>3</sup>H]-IAA per mg seedling fresh weight for 1 h in liquid ATS medium. Scintillation counts were recorded after removal of radiolabeled IAA and ten subsequent wash steps with liquid ATS. Bar plots show mean [<sup>3</sup>H]-IAA levels of three biological replicates and error bars denote SEM. No significant differences were detected by a two-sided t-test ( $P < 0.05$ ). (B) Stacked bars show the number of up- and down-regulated genes with an auxin-induced significant ( $\text{fdr} \leq 0.05$ ) change in expression level in black and white, respectively. (C) Venn diagrams illustrate the number of genes commonly or specifically up-regulated in *A. thaliana* (gray) and *A. lyrata* (green) after 1 h and 3 h of auxin treatment ( $\text{lfc} = \log_2$  fold change).

### **Fig. 3: Cluster analysis of auxin-regulated genes and allocation of known cis-regulatory elements**

Hierarchical clustering of genes that showed an auxin-induced expression response (coefficient of variation ( $\text{cv}$ )  $> 0.5$ ) in at least one species at one time point of auxin treatment using a modified Pearson correlation ( $1 - \text{mod.r}$ ) among expression profiles as distance measure. A threshold of  $1 - \text{mod.r} = 0.3$  provided 14 clusters. Expression profiles show mean (solid lines) and median (dotted lines) expression levels of genes in one cluster. Areas shaded in grey and green denote interquartile ranges for *A. thaliana* and *A. lyrata*, respectively. Bar plots illustrate the presence of known cis-element sequences with functional relevance in auxin biology. “4”: AATAAG, “11”: TGTCTC, “13”: CACATG, “14”: CGTG[TC]G, “16”: CACCAT, “18”: TGTCTG, “20”: TGT[CG]T[CG][CGT]C, “29”: TGTATATAT, and “35”: ATACGTGT. A full description of cis-elements is shown in Tab. S2 and S3. A comprehensive analysis of the presence of known

regulatory sequences is depicted in Fig. S3).

#### **Fig. 4: *De novo* identification of promoter elements**

(A) Analysis of promoter and expression diversity in genes that are significantly up-regulated in both species, up-regulated in either *A. thaliana* or *A. lyrata* or non-responsive (neutral) to 1 hour of auxin treatment. Divergence among expression profiles and promoter sequences was assessed by *mod.r* correlation of expression profiles and 8-mer sliding window correlation (*kmer.r*) results of promoter sequences, respectively. (B) *De novo* identification of putative *cis*-regulatory elements significantly overrepresented in auxin-induced genes identified using Dimont. Motifs shown were significantly enriched in genes up-regulated in both species (data set 1) or in at least one species (data set 2). Motifs were additionally tested for enrichment in an independent auxin-induced expression data set of *A. thaliana* (see *p*' values in Fig. S4). Frequency of occurrence [%] in the positive and control data sets are denoted by  $\%_{positive}$  and  $\%_{control}$ , respectively.

#### **Fig. 5: *AUX/IAA* expression divergence correlates with downstream expression profiles**

(A) Promoter divergence for core auxin signaling genes was determined as described in Fig. 4A. (B) Hierarchical clustering of PIF-normalized (mean-centered) *AUX/IAA* expression profiles using 1-*mod.r* as distance measure. (C) Selected genes with expression profiles that are positively (+) or negatively (-) correlated to the mean expression profiles (solid black lines) of *AUX/IAA* clusters shown in B as determined by the profile interaction finder (PIF) algorithm. A complete list of identified genes is presented as Data file S1.

## Figures

**Fig. 1**

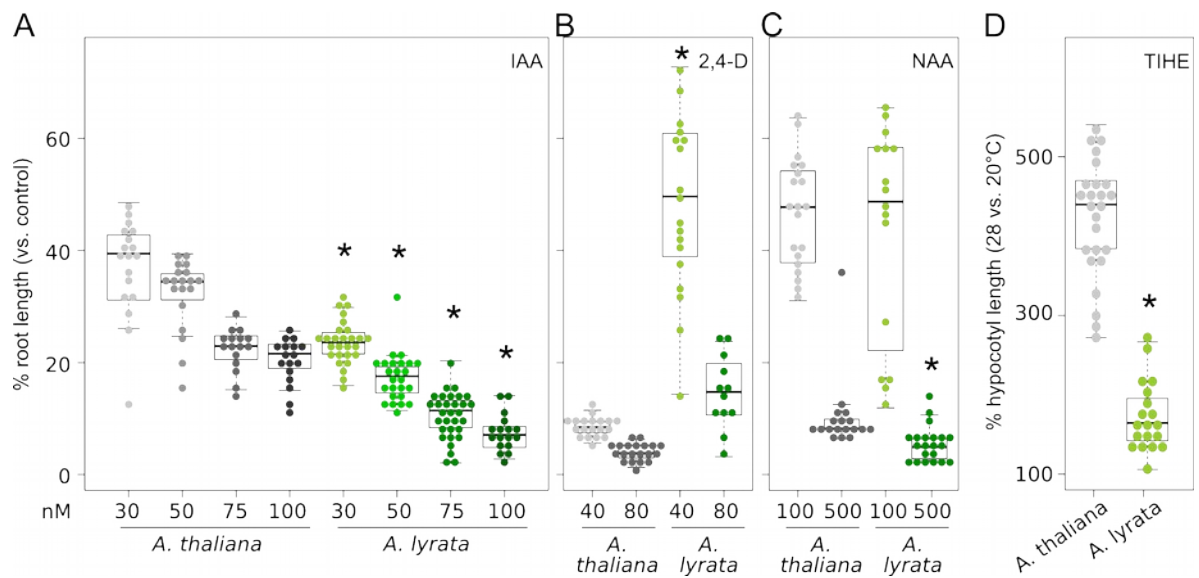

**Fig. 2**

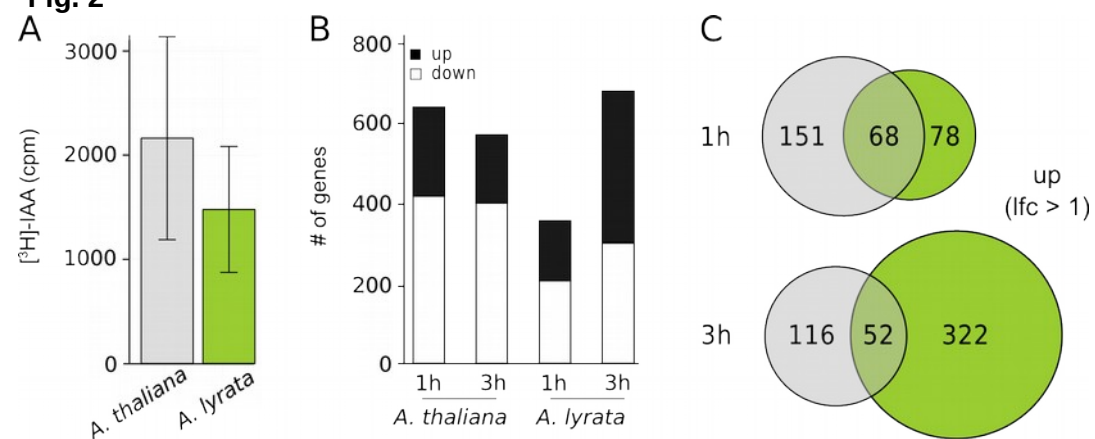

**Fig. 3**

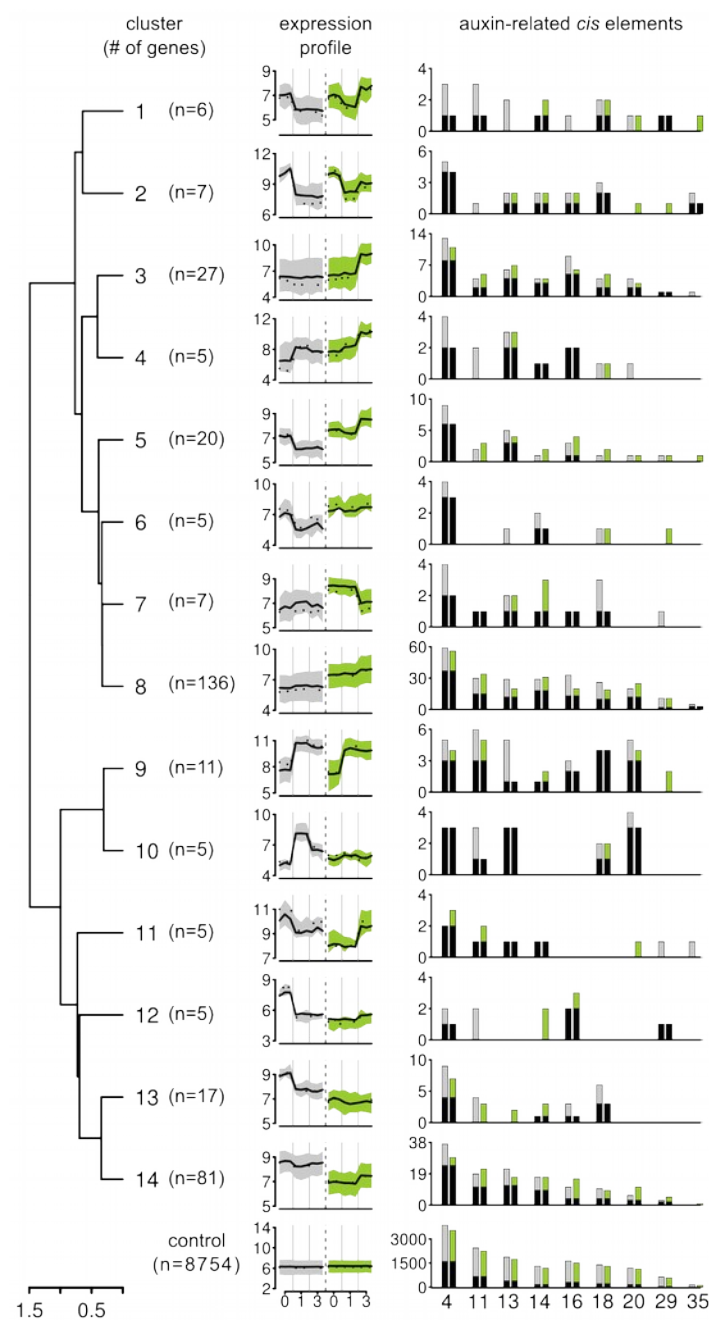

**Fig. 4**

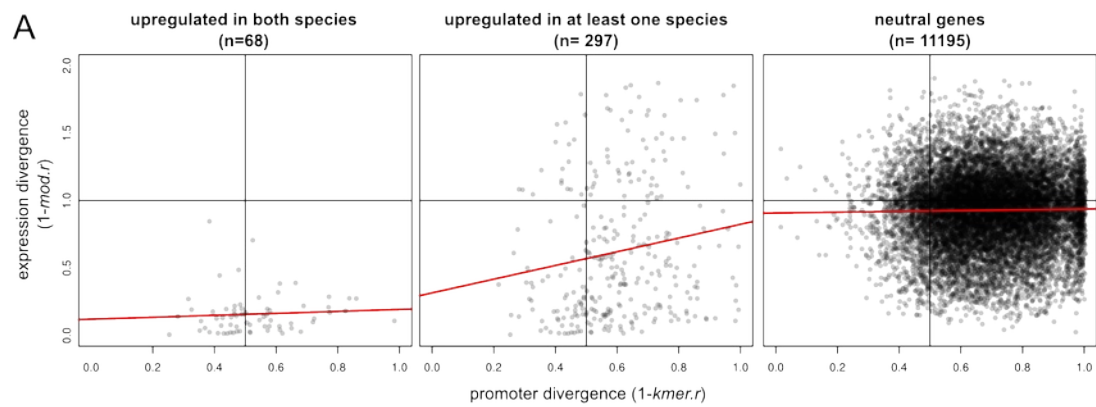

**B**

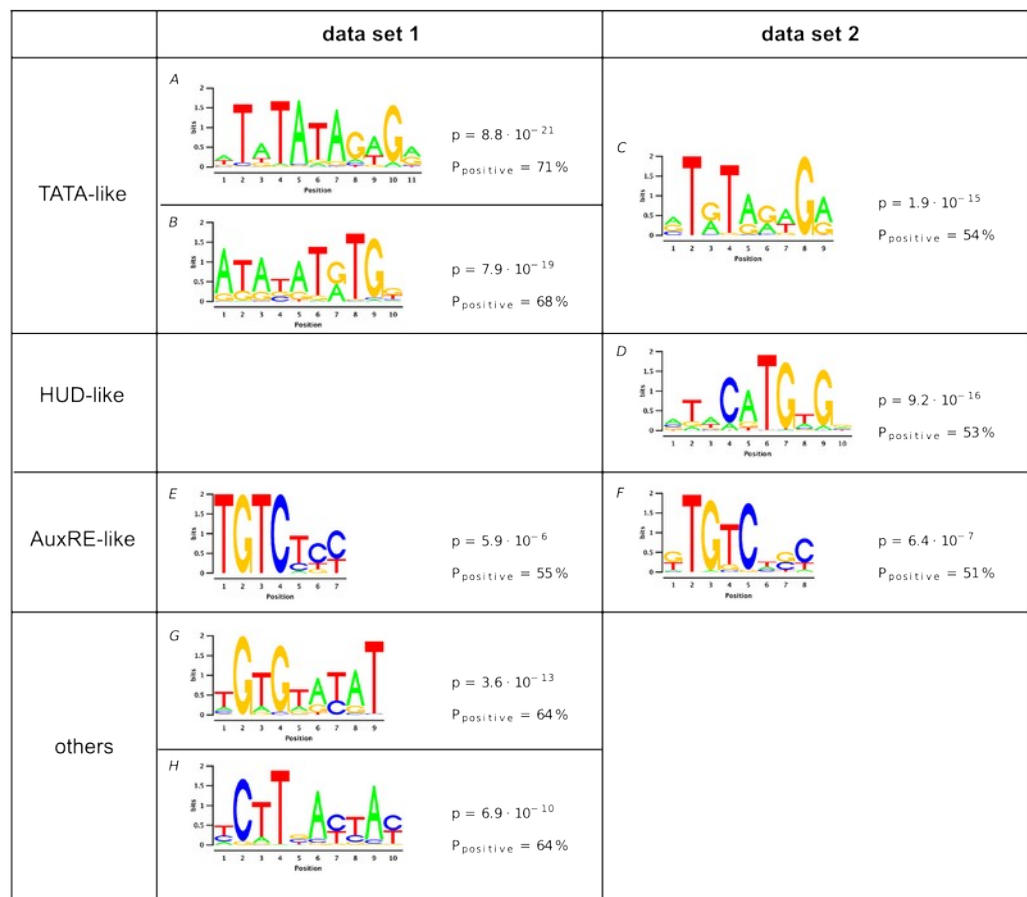

**Fig. 5**

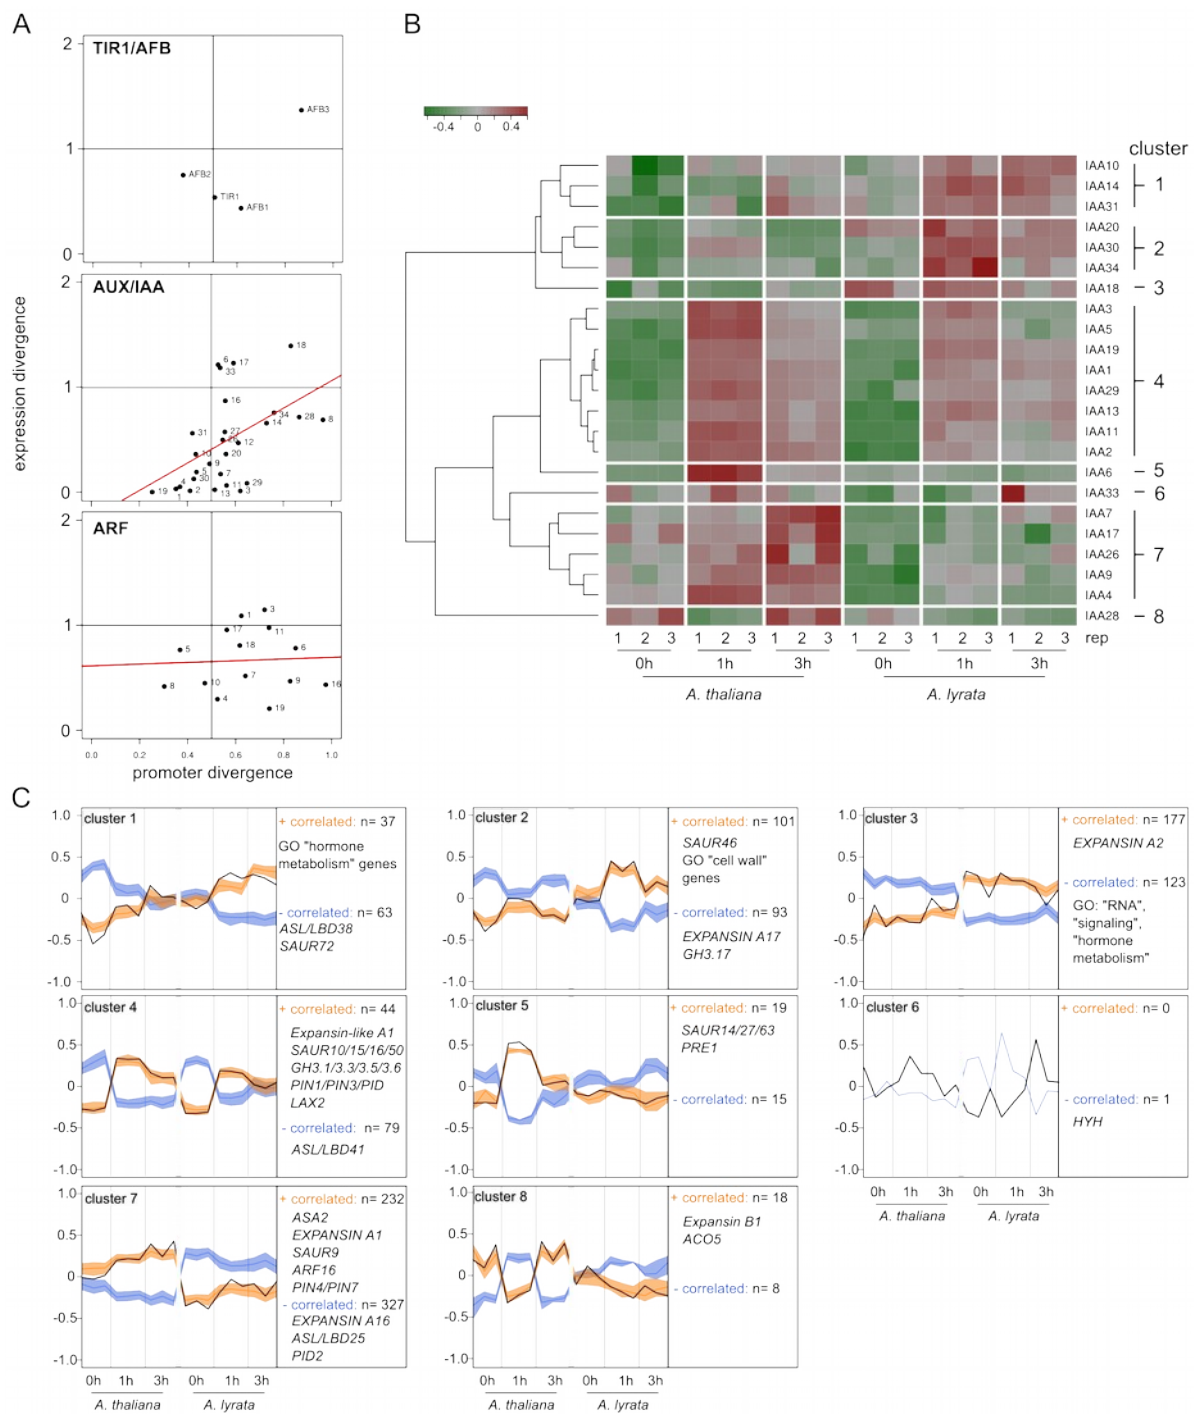

Source: http://biorxiv.org/content/10.1101/038422v1.full.pdf
